# Supplementary material
Source: PubMed Central journal article supplement (PMC7814269)
Supplement: 15006_2021_9530_MOESM1_ESM.pdf [file 15006_2021_9530_MOESM1_ESM.pdf]

## Literatur

1. <https://www.england.nhs.uk/coronavirus/wp-content/uploads/sites/52/2020/12/C0956-Patient-Group-Direction-Pfizer-BioNTech-COVID-Vaccine-Summary-document-11-December-2020.pdf>. Accessed 15.12.2020.
2. <https://www.sciencemag.org/news/2020/12/suspicious-grow-nanoparticles-pfizer-s-covid-19-vaccine-trigger-rare-allergic-reactions?>
3. Ring J, Beyer K, Biedermann T et al.: Guideline (S2) on acute therapy and management of anaphylaxis: 2021 update. S2-Guideline of the German Society for Allergy and Clinical Immunology (DGAKI), the Medical Association of German Allergologists (AeDA), the Society of Pediatric Allergy and Environmental Medicine (GPA), the German Academy of Allergy and Environmental Medicine (DAAU), the German Professional Association of Pediatricians (BVKJ), the Society for Neonatology Paediatric Intensive Care (GNPI), the German Society of Dermatology (DDG), the Austrian Society for Allergy and Immunology (ÖGAI), the Swiss Society for Allergy and Immunology (SGAI), the German Society of Anaesthesiology and Intensive Care Medicine (DGAI), the German Society of Pharmacology (DGP), the German Respiratory Society (DGP), the patient organization German Allergy and Asthma Association (DAAB), the German Working Group of Anaphylaxis Training and Education (AGATE). *Allergo J Int* 2021;30 [in press].
4. Caubet J-C, Ponvert C: Vaccine allergy. *Immunology and allergy clinics of North America*. 2014;34(3):597-613, ix.
5. Dreskin SC, Halsey NA, Kelso JM et al.: International Consensus (ICON): allergic reactions to vaccines. *The World Allergy Organization journal*. 2016;9(1):32.
6. McNeil MM, DeStefano F: Vaccine-associated hypersensitivity. *J Allergy Clin Immunol*. 2018;141(2):463-72.
7. Nilsson L, Brockow K, Alm J et al.: Vaccination and allergy: EAACI position paper, practical aspects. *Pediatric allergy and immunology: official publication of the European Society of Pediatric Allergy and Immunology*. 2017;28(7):628-40.
8. Wood RA: Allergic reactions to vaccines. *Pediatric allergy and immunology : official publication of the European Society of Pediatric Allergy and Immunology*. 2013;24(6):521-6.
9. Polack FP, Thomas SJ, Kitchin N et al.: Safety and Efficacy of the BNT162b2 mRNA Covid-19 Vaccine. *The New England journal of medicine*. 2020.
10. Scarbrough Lefebvre CD, Terlinden A, Standaert B: Dissecting the indirect effects caused by vaccines into the basic elements. *Human vaccines & immunotherapeutics*. 2015;11(9):2142-57.
11. Pizzimenti S, Heffler E, Gentilcore E et al.: Macrogol hypersensitivity reactions during cleansing preparation for colon endoscopy. *The journal of allergy and clinical immunology In practice*. 2014;2(3):353-4.
12. Wenande E, Garvey LH: Immediate-type hypersensitivity to polyethylene glycols: a review. *Clinical and experimental allergy: journal of the British Society for Allergy and Clinical Immunology*. 2016;46(7):907-22.
13. Wylon K, Döller S, Worm M: Polyethylene glycol as a cause of anaphylaxis. *Allergy, Asthma & Clinical Immunology*. 2016;12(1):67.
14. Stone CA, Liu Y, Relling MV et al.: Immediate Hypersensitivity to Polyethylene Glycols and Polysorbates: More Common Than We Have Recognized. *The journal of allergy and clinical immunology In practice*. 2018;7(5):1533-40.e8.
15. Schwede K, Simon JC, Treudler R: A case of severe immediate type reaction to macrogol and polysorbate 60 after intravaginal drug application. *Eur J Dermatol*. 2019 Jun 1;29(3):329-331.
16. Zhou Z-H, Stone CA, Jakubovic B et al.: Anti-PEG IgE in anaphylaxis associated with polyethylene glycol. *The journal of allergy and clinical immunology In practice*. 2020.
17. Szebeni J, Frontana JL, Wassef NM: Hemodynamic changes induced by liposomes and liposome-encapsulated hemoglobin in pigs: a model for pseudoallergic cardiopulmonary reactions to liposomes. Role of complement and inhibition by soluble CR1 and anti-C5a antibody. *Circulation*. 1999 May 4;99(17):2302-9.
18. Yang Q, Jacobs TM, McCallen JD: Analysis of Pre-existing IgG and IgM Antibodies against Polyethylene Glycol (PEG) in the General Population. *Anal Chem*. 2016 Dec 6;88(23):11804-11812.
19. Lange L: Allergene in Impfstoffen. *Allergologie* 2016; 39 (8), 357-61.
20. Grüber C, Ankermann T, Bauer CP et al.: Impfungen von Kindern mit erhöhtem Allergierisiko. *Monatsschrift Kinderheilkunde* 2016; 164: 52-58.
